# Supplementary material
Source: MDPI journal article supplement (https://www.mdpi.com/1996-1073/9/10/764)
Supplement: s1 [file s1]

# Supplementary Materials: Template-Free Fabrication of $\text{Bi}_2\text{WO}_6$ Hierarchical Hollow Microspheres with Visible-Light-Driven Photocatalytic Activity

Yuxue Zhou, Xiangdong Meng, Ling Tong, Xianghua Zeng and Xiaobing Chen

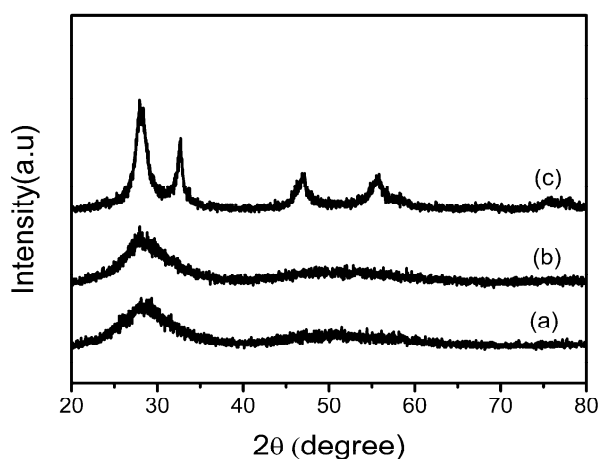

**Figure S1.** X-ray diffraction (XRD) patterns of obtained products at 160 °C by reaction for (a) 1 h, (b) 2 h and (c) 4 h, respectively.

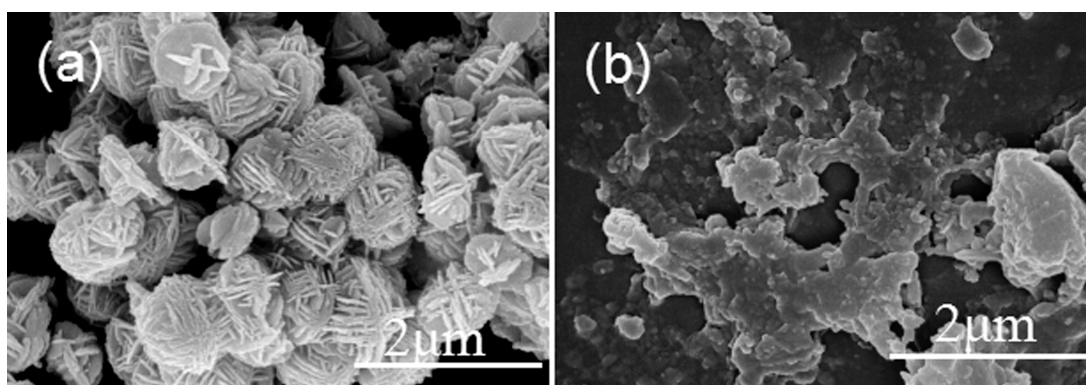

**Figure S2.** Scanning electron microscopy (SEM) images of bismuth tungstate ( $\text{Bi}_2\text{WO}_6$ ) samples obtained at 160 °C for 12 h with different volume ratio of ethylene glycol (EG), and ethanol (EA) ( $V_{\text{EG}}:V_{\text{EA}}$ ). (a) 1:5 and (b) 1:0.

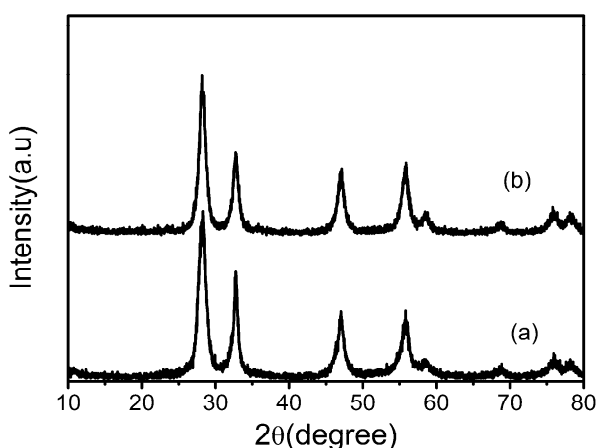

**Figure S3.** XRD patterns of obtained  $\text{Bi}_2\text{WO}_6$  products at 160 °C for 12 h with different volume ratio of EG and EA ( $V_{\text{EG}}:V_{\text{EA}}$ ). (a) 1:5 and (b) 1:0.

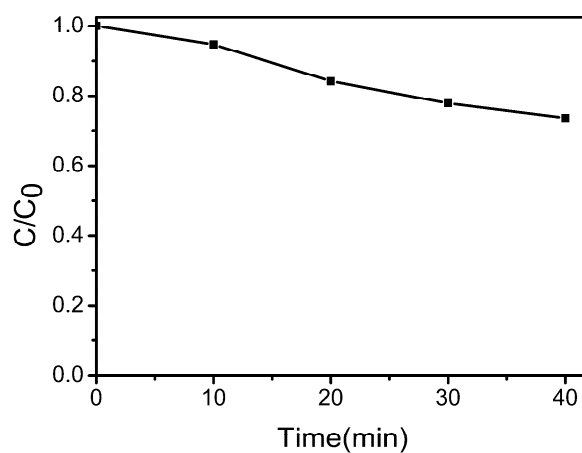

**Figure S4.** Photocatalytic activities on degradation of rhodamine B (RhB) from  $\text{Bi}_2\text{WO}_6$  hollow microspheres under ultraviolet (UV) irradiation.

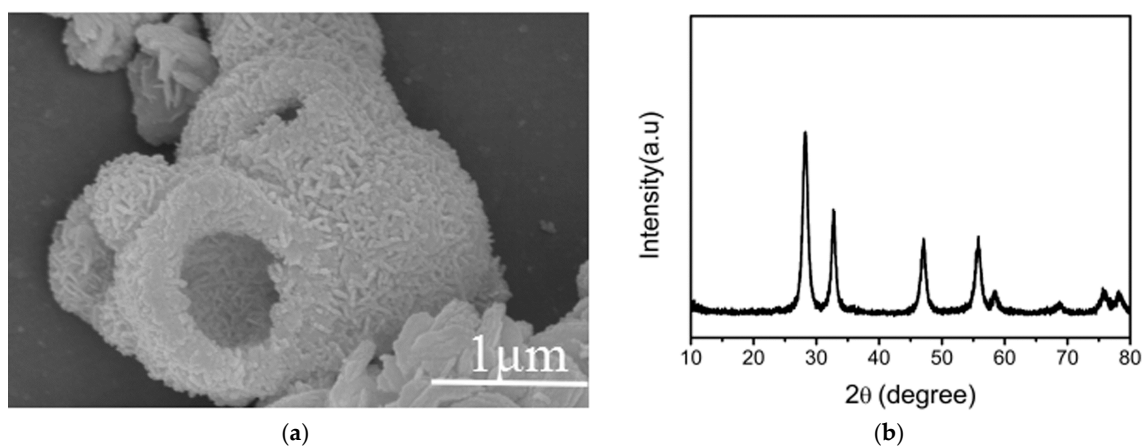

**Figure S5.** (a) SEM and (b) XRD pattern of  $\text{Bi}_2\text{WO}_6$  hollow microspheres after photocatalytic degradation of RhB under visible-light irradiation.

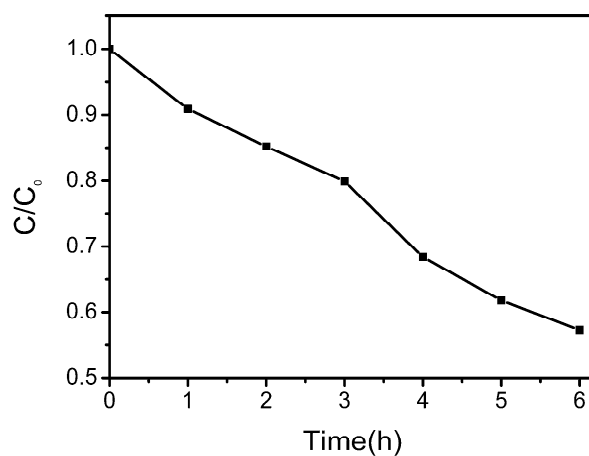

**Figure S6.** Photocatalytic activities on degradation of 4-chlorophenol (4-CP) from  $\text{Bi}_2\text{WO}_6$  hollow microspheres under visible-light irradiation.
